# Supplementary material for: Measurement properties of comorbidity indices in maternal health research: a systematic review
Source: Springer Nature journal article supplement (doi:10.1186/s12884-017-1558-3), 2017-11-13
Supplement: MOESM1 [file 15220230]

- 1 **Appendix A. Search strategy in MEDLINE, EMBASE**
- 2 Pregnant women
- 3 Obstetrics/
- 4 Pregnant woman/
- 5 Postpartum period/
- 6 Perinatal care/
- 7 Pregnancy/
- 8 Pregnancy, high- risk/
- 9 Exp Pregnancy complications/
- 10 Delivery, Obstetric/ mo [mortality]
- 11 Labor, obstetric/
- 12 Obstetric labor complication/
- 13
- 14 Mortality
- 15 Maternal death/
- 16 Maternal mortality/
- 17
- 18 Comorbidity Index
- 19 Exp health status indicators to include:
- 20 Health status indicators/or apache/or organ dysfunction scores/ or patient acuity/ or
- 21 “severity of illness index”/ or karnofsky performance statues/ or sickness impact
- 22 profile” outcome assessment (health care)”
- 23 Forecasting/
- 24 Evaluation studies as topic/or program evaluation/ or “reproducibility of results/ or
- 25 validation studies as topic/
- 26 Exp Risk to include: risk/ or logistic models/ or risk assessment/ or risk factors/
- 27 Calibration/
- 28 decision support techniques/
- 29 roc curve/
- 30
- 31 Keywords
- 32 Charlson.tw.
- 33 Elixhauser.tw.

1 **Appendix B. Weighted conditions of the Maternal Comorbidity Index**

| Assigned weights for diseases | Conditions                                                                                                                                                                |
|-------------------------------|---------------------------------------------------------------------------------------------------------------------------------------------------------------------------|
| 5                             | Severe Preeclampsia or Eclampsia<br>Chronic Congestive Heart Failure                                                                                                      |
| 4                             | Congenital Heart Disease<br>Pulmonary Hypertension                                                                                                                        |
| 3                             | Chronic Ischemic Heart Disease<br>Sickle Cell Disease                                                                                                                     |
| 2                             | Multiple Gestation<br>Cardiac Valvular Disease<br>Systemic Lupus Erythematosus<br>HIV<br>Mild or Unspecified Preeclampsia<br>Drug Abuse<br>Placenta Previa                |
| 1                             | Chronic Renal Disease<br>Pre-existing Hypertension<br>Previous Cesarean Delivery<br>Gestational Hypertension<br>Alcohol Abuse<br>Asthma<br>Pre-existing Diabetes Mellitus |
| 3                             | Maternal Age (y), Older than 44                                                                                                                                           |
| 2                             | 40-44                                                                                                                                                                     |
| 1                             | 35-39                                                                                                                                                                     |

2

3

1 **Appendix C. Weighted conditions of the Charlson Comorbidity Index**

| Assigned weights for diseases | Conditions                                                                                                                                                                                             |
|-------------------------------|--------------------------------------------------------------------------------------------------------------------------------------------------------------------------------------------------------|
| 6                             | Metastatic Solid Tumor<br>AIDS                                                                                                                                                                         |
| 3                             | Moderate or Severe Liver Disease                                                                                                                                                                       |
| 2                             | Hemiplegia<br>Moderate or Severe Renal Disease<br>Diabetes with End Organ Damage<br>Any Tumor<br>Leukemia<br>Lymphoma                                                                                  |
| 1                             | Myocardial Infarct<br>Congestive Heart Failure<br>Peripheral Vascular Disease<br>Dementia<br>Chronic Pulmonary Disease<br>Connective Tissue Disease<br>Ulcer Disease<br>Mild Liver Disease<br>Diabetes |

2

3

4

5

6

1 **Appendix D. List of comorbidities in the Elixhauser Comorbidity Index**

---

|                                             |                                                      |
|---------------------------------------------|------------------------------------------------------|
| 1. Congestive Heart Failure                 | 16. AIDS                                             |
| 2. Cardiac Arrhythmias                      | 17. Lymphoma                                         |
| 3. Valvular Disease                         | 18. Metastatic Cancer                                |
| 4. Pulmonary Circulation Disorders          | 19. Solid Tumor without Metastasis                   |
| 5. Peripheral Vascular Disorders            | 20. Rheumatoid Arthritis/ Collagen Vascular Diseases |
| 6. Hypertension                             | 21. Coagulopathy                                     |
| 7. Paralysis                                | 22. Obesity                                          |
| 8. Other Neurological Disorders             | 23. Weight Loss                                      |
| 9. Chronic Pulmonary Disease                | 24. Fluid and Electrolyte Disorders                  |
| 10. Diabetes, uncomplicated                 | 25. Blood Loss Anemia                                |
| 11. Diabetes, complicated                   | 26. Deficiency Anemia                                |
| 12. Hypothyroidism                          | 27. Alcohol Abuse                                    |
| 13. Renal Failure                           | 28. Drug Abuse                                       |
| 14. Liver Disease                           | 29. Psychoses                                        |
| 15. Peptic Ulcer Disease excluding Bleeding | 30. Depression                                       |

---
